1 Prevalence of Occupation Associated with Increased Mobility During COVID-19 Pandemic

2  
3 Enbal Shacham (Professor, PhD, [enbal.shacham@slu.edu](mailto:enbal.shacham@slu.edu))<sup>1</sup>, Stephen Scroggins (Doctoral  
4 Student/Researcher, [steve.scroggins@slu.edu](mailto:steve.scroggins@slu.edu))<sup>1</sup>, Matthew Ellis (Doctoral Student/Researcher,  
5 [matthew.ellis@slu.edu](mailto:matthew.ellis@slu.edu))<sup>1</sup>, Alexander Garza (Chief Medical Officer, M.D.,  
6 [alexander.garza@ssmhealth.com](mailto:alexander.garza@ssmhealth.com))

- 7 1. Saint Louis University, College for Public Health and Social Justice, Department of  
8 Behavioral Science and Health Education and St. Louis University, Geospatial Institute,  
9 3545 Lafayette Ave., St. Louis, MO 63104, U.S.  
10 2. SSM Health, St. Louis, MO

11

12 Abstract

13 Objective: Identifying geographic-level prevalence of occupations associated with mobility  
14 during local stay-at-home pandemic mandate.

15 Methods: A spatio-temporal ecological framework was applied to determine census-tracts that  
16 had significantly higher rates of occupations likely to be deemed essential: food-service, business  
17 and finance, healthcare support, and maintenance. Real-time mobility data was used to determine  
18 the average daily percent of residents not leaving their place of residence. Spatial regression  
19 models were constructed for each occupation proportion among census-tracts within a large  
20 urban area.

21 Results: After adjusting for demographics, results indicate census-tracts with higher proportion  
22 of food-service workers, healthcare support employees, and office administration staff are likely  
23 to have increased mobility.

24 Conclusions: Increased mobility among communities is likely to exacerbate COVID-19  
25 mitigation efforts. This increase in mobility was also found associated with specific  
26 demographics suggesting it may be occurring among underserved and vulnerable populations.  
27 We find that prevalence of essential employment presents itself as a candidate for driving  
28 inequity in morbidity and mortality of COVID-19.

29

30

31

32 Keywords: COVID-19; community mobility; occupation; spatio-temporal analysis

33

34

35  
36  
37  
38  
39  
40  
41  
42  
43  
44  
45  
46  
47  
48  
49  
50  
51  
52  
53  
54  
55

Three-question Summary:

- 1) Employees and workers deemed essential during the COVID-19 pandemic are likely to endure additional risk of infection due to community exposure. While preliminary reports are still quantifying this risk, we set out to examine if prevalence of specific occupations could be used to evaluate overall community-level risk based on stay-at-home mandate adherence.
- 2) Study results suggest that that not only are certain occupation geo-spatially associated with movement outside the home but are also associated with demographic characteristics likely to contribute to inequity of COVID-19 morbidity.
- 3) Often, nuanced inequities are lost in the larger data samples, being able to identify possible inequities from other sources such as prevalence of occupation among communities, remains an important and applicable alternative.

56

57 Introduction

58 Inequity in incidence of morbidity and mortality related to the novel coronavirus (COVID-19)  
59 has become apparent across U.S. communities. Racial and ethnic minorities are experiencing  
60 higher rates of mortality, more rural areas are facing shortages in healthcare resources, and  
61 individuals living in poverty continue to present at hospitals in more advanced stages of COVID-  
62 19; decreasing the likelihood of positive outcomes.[1-3] Additionally, communities are  
63 confronting numerous economic and social challenges brought on by the pandemic; reflected by  
64 the nearly 40 million jobs lost, and only a small proportion regained, since the start of the  
65 pandemic in the U.S.[4, 5] However, for individuals in frontline employment, or essential  
66 occupations, who leave the home for work, inequity and risk of COVID-19 is not yet fully  
67 understood. As U.S. mortality reaches over 200,000 as of October 2020, there is a need to  
68 identify risk more effectively among vulnerable populations.[6]

69 Throughout the U.S., state and local governments have implemented mitigation mandates to  
70 slow the spread of COVID-19.[7] Commonly and with varying degrees of efficacy, these efforts  
71 include face-covering requirements, limitations on business capacities, changes to hours of  
72 business operations, social-distancing, and recommendations to stay at home.[8] By the nature of  
73 viral transmission, staying home remains the most effective COVID-19 prevention method,  
74 though it also remains the most challenging for some. Among U.S. states, 42 have published  
75 guidelines and mandates of what may constitute an essential worker; an individual employed in  
76 an occupation required to be present at a work, largely unable to stay at home. The U.S.  
77 Department of Homeland Security defines an essential worker as someone with a range of  
78 responsibilities whose continued work is critical to infrastructure operations.[9] Historically, an

79 essential worker has become synonymous with emergency personal: health workers, law  
80 enforcement, and those in safety occupations. However, recent research, has shown essential  
81 workforce during the COVID-19 pandemic is likely to include transportation workers,  
82 employees of restaurants and grocery stores, educators, among other seemingly unrelated  
83 occupations.[10] Among these newly-defined essential workers, the burden of community  
84 mobility and increased chance of COVID-19 exposure remains unclear both individually and  
85 ecologically.

86 Historically, there has been little understood about the impact that community mobility has had  
87 on the health of an individual. Previous location-anchored research focused on home or work  
88 address, yet the movement throughout an individual's daily lives offers insights, in this case  
89 particularly to potential COVID-19 exposure. The purpose of this study was to determine the  
90 association among prevalence of occupations and work-related mobility framed within the  
91 current COVID-19 pandemic.

## 92 Materials and Methods

93 This study employed an ecological design with observations at the census-tract level among two  
94 densely populated urban Midwest counties (n=305). The study period consisted of all days from  
95 March 16, 2020 to May 17, 2020; coinciding with seven days before a stay-at-home mandate for  
96 all 1.3 million approximate residents within census-tracts and fifty-six days during the stay at  
97 home mandate.

98 Two secondary data sources were utilized for this study. The 2018 5-year American Community  
99 Survey (ACS) was used to determine proportion of workers, aged 16 and older, in occupations of  
100 interest among each census-tract. These occupations included: 1) healthcare support, 2) food

101 preparation and service, 3) building, ground maintenance 4) management, business, and finance,  
102 and 5) office administration support.[11] The ACS was also used to acquire socio-demographic  
103 variable per-census-tract that were likely to be associated with adverse health outcome; (1)  
104 proportion racial/ethnic minority, (2) proportion earning wages below the federal poverty level,  
105 (3) average number of people per household, (4) population density per-square mile, and (5)  
106 proportion of residents aged >64.

107 Mobility among census-tracts was estimated using aggregated and anonymized data and acquired  
108 as part of a COVID-19 research consortium managed by SafeGraph, LTD, a data management  
109 firm. This data was collected using mobile smart device pings collected throughout the day and  
110 used to estimate geo-global position. This large dataset contains an estimated 5-10% of the U.S.  
111 population. Residency of devices, used to establish proportion of sample leaving home, was  
112 calculated by determining the location the device during overnight hours of the day over the  
113 course of six weeks.[12] Additionally, this data has been leveraged for similar studies and  
114 surveillance, used by state and national organizations.[13]

115 Descriptive statistics were calculated for all variables. A series of Getis-Ord  $G_i^*$  cluster analysis  
116 were applied among census-tracts for each occupation category to determine locations where  
117 they were significantly higher or lower.

118 Each occupational category was used as a primary predictor in a series of multivariate spatial  
119 regression models predicting the average proportion of census-tract residents adhering to the  
120 stay-at-home order. Each model was adjusted for socio-demographics described a priori as well  
121 as the average proportion of census-tract residents staying home seven days before the stay-at-  
122 home order as a baseline measurement of mobility. Each model was first constructed under  
123 ordinary-least square regression assumptions and a diagnostic cascade was used to detect if

124 spatial dependence was present. Preliminary results indicated that adjusting for this dependency  
125 was necessary, thus spatial-lag models were determined to be the best fit.

126 Both descriptive and inferential analyses were completed using R 4.0 and GeoDa 1.14.[14, 15]  
127 Significance was determined at  $\alpha$  of 0.05 and spatially detected using a pseudo p-value  
128 permutation. Spatial weights were applied using a queen contiguity matrix.

## 129 Results

130 As shown in Table 1, prior to the stay-at-home policy, a daily average of 34.75% +4.92 of the  
131 sample did not leave home. During the eight weeks of the stay-at-home policy, a daily average of  
132 41.59% +5.51 did not leave home. Average proportions of census-tract residents employed in the  
133 occupations of interest included: 15.86% +8.06 working in management, business, and finance,  
134 12.37%+4.91 working in office administration support; 6.44% +4.24 working in food  
135 preparation and service; 4.25% +4.65 working in healthcare support; and 4.13% +3.68 working  
136 in building, ground maintenance.

137 Figure 1 details significant geographical clusters ( $p < 0.05$ ) where each occupation category was  
138 higher or lower than dispersion would expect. Among the 305 census-tracts, 50 (16.39%) were  
139 identified as having significantly higher proportion of healthcare support workers (Fig 1a); 33  
140 (10.81%) as having significantly higher proportion food service and preparation workers (Fig  
141 1b); 57 (18.68%) as having significantly higher building, ground maintenance workers (Fig 1c);  
142 66 (21.64%) as having significantly higher proportion of business, management, and finance  
143 workers (Fig 1d); and 46 (15.08%) identified as clusters with higher proportion of office  
144 administration workers (Fig 1e).

145 Table 2 details five spatial regression models, each adjusted for spatial lag, predicting proportion  
146 of residents staying home during stay-at-home policy implementation and adjusted for socio-  
147 demographics. Model 1 reveals that for every 10% increase in healthcare support workers, the  
148 proportion staying home decreases by 1% per-census-tracts ( $\beta = -0.1$ ,  $p=0.020$ ). Similarly, every  
149 10% increase in food service and preparation workers results in a 1% decrease in persons staying  
150 home (model 2,  $\beta = -0.01$ ,  $p=0.019$ ) Model 5 shows the effects of office administrative workers  
151 per census-tract; a 16% increase results in a 1% decrease in persons staying home ( $\beta = 0.06$ ,  
152  $p=0.042$ ). Model 4 displays an opposite pattern; for every 12% increase in proportion of workers  
153 in management, business, or finance occupations the proportion of persons staying home  
154 increased by 1% ( $\beta = 0.08$ ,  $p=0.002$ ). The occupation category of building, ground maintenance  
155 was found not to be a significant spatial predictor of COVID-19 mitigation compliance when  
156 adjusting for tract characteristics (model 3).

157 Within regression models, several of the socio-demographic characteristics were determined to  
158 be significant predictors of populations staying home. Consistent across all models, as proportion  
159 of older adults and population density increased, proportion of census-tract residents staying  
160 home also increased. As proportion of those earning income below the poverty level increased,  
161 the proportion of tract residents staying home decreased significantly in each model. Average  
162 household size and proportion racial/ethnic minorities per-census-tract were also identified as  
163 significant model predictors, although inconsistently throughout models.

## 164 Discussion

165 This study was able to identify relationships among prevalence of occupations and patterns of  
166 community mobility that have the potential increase risk for COVID-19 exposure among  
167 residents and communities. Areas where census-tract residents were proportionally less likely to

168 remain at home were also likely to have more individuals employed in the fields of healthcare  
169 support, food preparation and service, and office administration support. In addition, our study  
170 results point to higher proportions of vulnerable populations sharing similar mobility patterns.  
171 These types of occupations identified within this study often require fewer credentials, pay  
172 substantially less, offer minimal flexibility, and are more likely to be among the limited  
173 employment opportunities available to racial and ethnic minorities and residents of low-income  
174 communities.[16, 17]

175 These findings highlight the accelerated impact of inequity related to COVID-19. While  
176 employment typically serves as a protective factor in many health outcomes, this pandemic has  
177 shown that types of employment and the varying context of essential employment change,  
178 leaving already vulnerable employees at increased risk for adverse health outcomes. Current  
179 literature supports this framework, finding that pandemic essential employment sites require  
180 ensuring proper protective equipment, sanitization, and safety protocols, yet, in many cases, are  
181 unavailable due the challenges in understanding the transmission and supply chain demands.[18]

182 Community mobility, in this case, provided insights to where and when individuals were home  
183 and work during a stay-at-home order. These methods and results highlight the utility of these  
184 types of data and how they can provide insights to patterns of behavior and health outcomes  
185 throughout communities. Other studies have more widely begun to use these methods and have  
186 great opportunity to the growth of our science about how neighborhoods impact our health.

187 {Painter, 2020 #2595 }

188 The pandemic has provided an opportunity for employers, employees, and the public to re-  
189 consider such positions now deemed “essential workers.” This will hopefully pave the way for  
190 acknowledging and addressing economic inequities that existed prior to the pandemic, but have



191 gained greater visibility, not only in terms of employee safety, but employee value and risk.  
192 Efforts such as raising the federal minimum wage and improving the accessibility of healthcare  
193 coverage should now be included in conversations highlighting lessons learned from the current  
194 pandemic.

195

196

197

198

199

200

201

202

203

204

205

206

207

208

209

210 Acknowledgements

211 This work was supported by the Sinquefeld Center for Applied Economic Research and the  
212 Geospatial Institute at Saint Louis University.

213 References

214 1. Patel JA, Nielsen FBH, Badiani AA, Assi S, Unadkat VA, Patel B et al. Poverty, inequality  
215 and COVID-19: the forgotten vulnerable. Public Health. 2020;183:110-1.

216 doi:10.1016/j.puhe.2020.05.006.

217 2. Millett GA, Jones AT, Benkeser D, Baral S, Mercer L, Beyrer C et al. Assessing differential  
218 impacts of COVID-19 on black communities. Annals of Epidemiology. 2020;47:37-44.

219 doi:<https://doi.org/10.1016/j.annepidem.2020.05.003>.

220 3. Peters DJ. Community Susceptibility and Resiliency to COVID-19 Across the Rural-Urban  
221 Continuum in the United States. The Journal of Rural Health. 2020;36(3):446-56.

222 doi:10.1111/jrh.12477.

223 4. U.S. Department of Labor. COVID-19 and the American Workforce. In: Wage and Hour  
224 Division. Washington D.C., U.S. 2020. <https://www.dol.gov/agencies/whd/pandemic>.

225 5. U.S. Bureau of Labor Statistics. Montly Labor Review. 2020. <https://www.bls.gov/opub/mlr/>.

226 6. National Center for Immunization and Respiratory Disease. Coronavirus Disease 19 U.S.  
227 Cases. Centers for Disease Control and Prevention. 2020.

228 <https://www.cdc.gov/coronavirus/2019-ncov/cases-updates/cases-in-us.html>.

229 7. Mervosh S, Lu, D., Swaves, V., Lee, J., Gamio, L., and Popovich, N. . See How All 50 States  
230 Are Reopening. The New York Times. 2020.

231 <https://www.nytimes.com/interactive/2020/us/states-reopen-map-coronavirus.html>.

- 232 8. National Center for Immunization and Respiratory Diseases. Implementation of Mitigation  
233 Strategies for Communities with Local COVID-19 Transmission. Centers for Disease Control  
234 and Prevention. 2020. Implementation of Mitigation Strategies for Communities with Local  
235 COVID-19 Transmission.
- 236 9. U.S. Department of Homeland Security. Advisory Memorandum On Ensuring Essential  
237 Critical Infrastructure Workers Ability to Work During the COVID-19 Responce. 2020.
- 238 10. The L. The plight of essential workers during the COVID-19 pandemic. Lancet.  
239 2020;395(10237):1587-. doi:10.1016/S0140-6736(20)31200-9.
- 240 11. 2018 5-year American Community Service [database on the Internet]2019. Available from:  
241 <https://www.census.gov/programs-surveys/acs/news/data-releases.2018.html>. Accessed: June 10,  
242 2020
- 243 12. SAFEGRAPH. Safegraph Data Documentation. 2020.  
244 <https://docs.safegraph.com/docs/places-manual>.
- 245 13. SAFEGRAPH. SafeGraph Provides CDC and 1000+ Organizations With Data to Fight the  
246 COVID-19 Crisis. 2020. [https://www.safegraph.com/blog/safegraph-provides-cdc-fed-and-1000-](https://www.safegraph.com/blog/safegraph-provides-cdc-fed-and-1000-organizations-with-data-to-fight-the-covid-19-crisis)  
247 [organizations-with-data-to-fight-the-covid-19-crisis](https://www.safegraph.com/blog/safegraph-provides-cdc-fed-and-1000-organizations-with-data-to-fight-the-covid-19-crisis).
- 248 14. Anselin LS, I. and Kho, Y. GeoDa 1.14. Chicago, IL, USA2019.
- 249 15. R Core Team. R: A language and environment for statistical computing. Vienna, Austria: R  
250 Foundation for Statistical Computing; 2020.
- 251 16. Bertola G, Blau FD, Kahn LM. Labor market institutions and demographic employment  
252 patterns. Journal of Population Economics. 2007;20(4):833-67. doi:10.1007/s00148-007-0137-8.
- 253 17. Cooper D. Workers of color are far more likely to be paid poverty-level wages than white  
254 workers. Economic Policy Institute. 2018.

- 255 18. Mehrotra P, Malani P, Yadav P, editors. Personal Protective Equipment Shortages During  
256 COVID-19—Supply Chain–Related Causes and Mitigation Strategies. JAMA Health Forum;  
257 2020: American Medical Association.
- 258
- 259

260

| Table 1. Characteristics of Census-tracts within City of St. Louis and St. Louis County (n=305) |                     |
|-------------------------------------------------------------------------------------------------|---------------------|
|                                                                                                 | Mean % (SD)         |
| <b>Stay-at-Home Policy Adherence</b>                                                            |                     |
| Daily % not leaving home before policy <sup>a</sup>                                             | 34.75 (4.92)        |
| Daily % not leaving home during policy <sup>b</sup>                                             | 41.59 (5.51)        |
| Non-white population                                                                            | 44.47 (33.42)       |
| Employed but income below federal poverty level                                                 | 13.99 (11.11)       |
| Residents within household                                                                      | 2.36 (0.34)         |
| Population density (mi <sup>2</sup> )                                                           | 4,317.36 (2,766.66) |
| Older adults, aged ≥65                                                                          | 15.70 (5.83)        |
| <b>Occupation</b>                                                                               |                     |
| Healthcare support                                                                              | 4.25 (4.65)         |
| Food preparation and service                                                                    | 6.44 (4.24)         |
| Building, ground maintenance                                                                    | 4.13 (3.68)         |
| Management, business, and finance                                                               | 15.86 (8.06)        |
| Office administration support                                                                   | 12.37 (4.91)        |
| a. Calculated from daily observations from March 16, 2020 to March 22, 2020                     |                     |
| b. Calculated from daily observations from March 23, 2020 to May 17, 2020                       |                     |

261

262

263

Table 2. Spatial Regression Models Predicting Proportion Residents Adhering to Stay-at-Home Policy Implementation

|                                                     | 1        |        | 2        |        | 3        |        | 4        |        | 5        |        |
|-----------------------------------------------------|----------|--------|----------|--------|----------|--------|----------|--------|----------|--------|
|                                                     | $\beta$  | Std. E | $\beta$  | Std. E | $\beta$  | Std. E | $\beta$  | Std. E | $\beta$  | Std. E |
| Proportion healthcare support                       | -0.1*    | 0.04   |          |        |          |        |          |        |          |        |
| Proportion food preparation and service             |          |        | -0.1*    | 0.04   |          |        |          |        |          |        |
| Proportion building, grounds, and maintenance       |          |        |          |        | -0.4     | 0.05   |          |        |          |        |
| Proportion management, business, and finance        |          |        |          |        |          |        | 0.08**   | 0.03   |          |        |
| Proportion office administration support            |          |        |          |        |          |        |          |        | -0.06*   | 0.03   |
| Daily average proportion staying home before policy | 0.62***  | 0.04   | 0.63***  | 0.04   | 0.63***  | 0.04   | 0.63***  | 0.04   | 0.62***  | 0.04   |
| Proportion racial/ethnic minority                   | -0.01    | 0.01   | -0.02**  | 0.01   | -0.02**  | 0.01   | -0.01    | 0.01   | -0.02*   | 0.01   |
| Proportion income earned below poverty              | -0.07*** | 0.02   | -0.06*   | 0.02   | -0.08**  | 0.02   | -0.06**  | 0.02   | -0.08*** | 0.02   |
| Average household size                              | 1.04*    | 0.5    | 0.91     | 0.5    | 0.89     | 0.50   | 0.9      | 0.49   | 0.74     | 0.49   |
| Population density (mi <sup>2</sup> )               | <0.01*** | <0.01  | <0.01*** | <0.01  | <0.01*** | <0.01  | <0.01*** | <0.01  | <0.01*** | <0.01  |
| Proportion of older adults aged >64 years           | 0.12***  | 0.03   | 0.11***  | 0.03   | 0.11***  | 0.03   | 0.10***  | 0.03   | 0.10***  | 0.003  |
| Intercept                                           | 8.35***  | 2.65   | 8.00***  | 2.63   | 8.32**   | 2.64   | 6.87**   | 2.70   | 9.3***   | 2.65   |
| $\rho$ (lag coefficient)                            | 0.22***  | 0.06   | 0.22***  | 0.06   | 0.22***  | 0.06   | 0.21***  | 0.06   | 0.22***  | 0.06   |
| Residuals Moran's I test                            | -0.01    |        | -0.01    |        | -0.02    |        | -0.01    |        | -0.01    |        |

$p$ -value, \*0.05, \*\*0.01, \*\*\*0.001

264

265

266

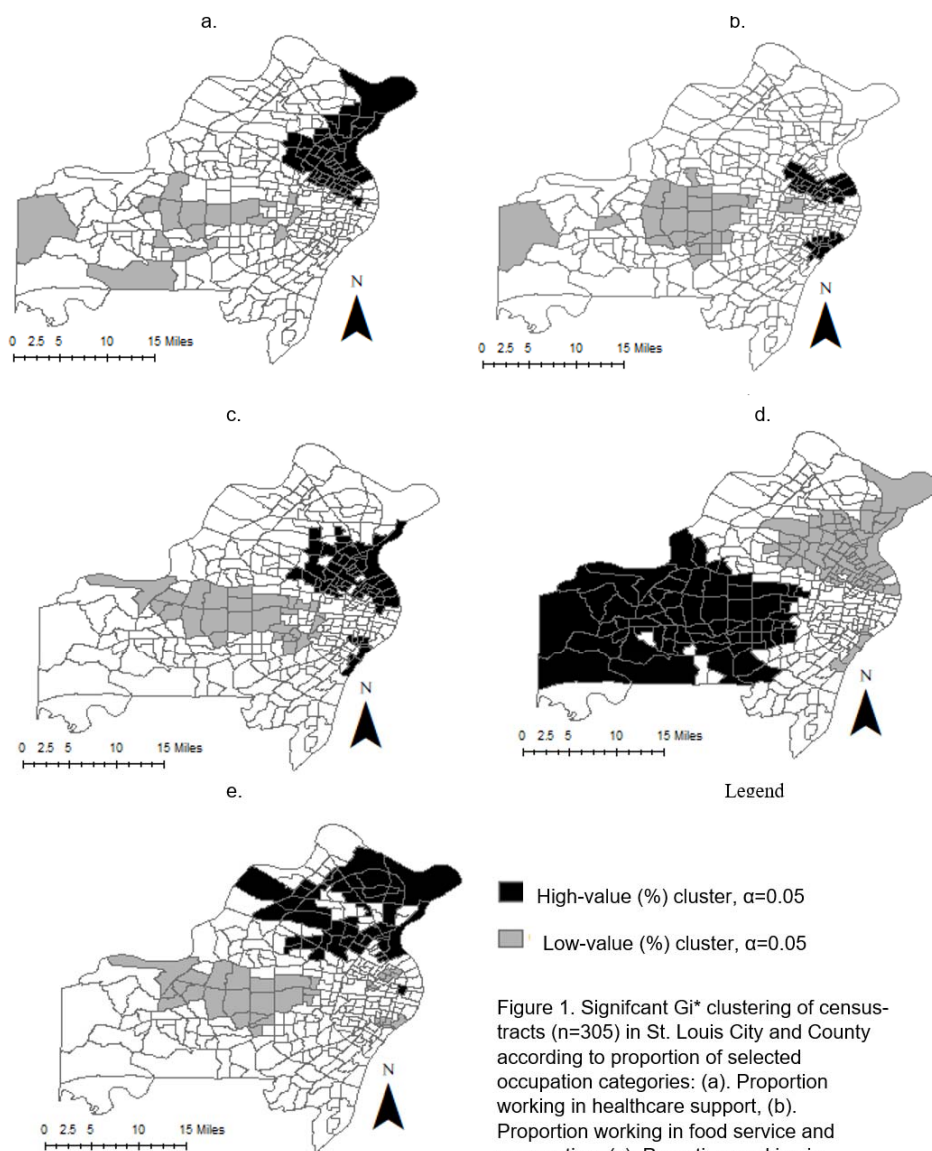

■ High-value (%) cluster,  $\alpha=0.05$

■ Low-value (%) cluster,  $\alpha=0.05$

Figure 1. Significant  $G_i^*$  clustering of census tracts ( $n=305$ ) in St. Louis City and County according to proportion of selected occupation categories: (a). Proportion working in healthcare support, (b). Proportion working in food service and preparation, (c). Proportion working in building, ground maintenance, (d) Proportion working in management, business, or finance, (e). Proportion working in office administration support.

267

268
